# Supplementary material for: Gene expression profiling meta-analysis reveals novel gene signatures and pathways shared between tuberculosis and rheumatoid arthritis
Source: PubMed Central journal article supplement (PMC6405138; doi:10.1371/journal.pone.0213470), 2019-03-07

### S1 Fig. Datasets meta-analysis pipeline.

Overview of the selection criteria and data analysis pipeline used. Expression profiles of human whole blood or blood cell populations from case control studies for Tuberculosis (TB) and rheumatoid arthritis (RA) were acquired through the Geoquery package in R, and further data normalization, analysis, and initial visualization were carried out through the different analysis modules in the NetworkAnalyst tool.

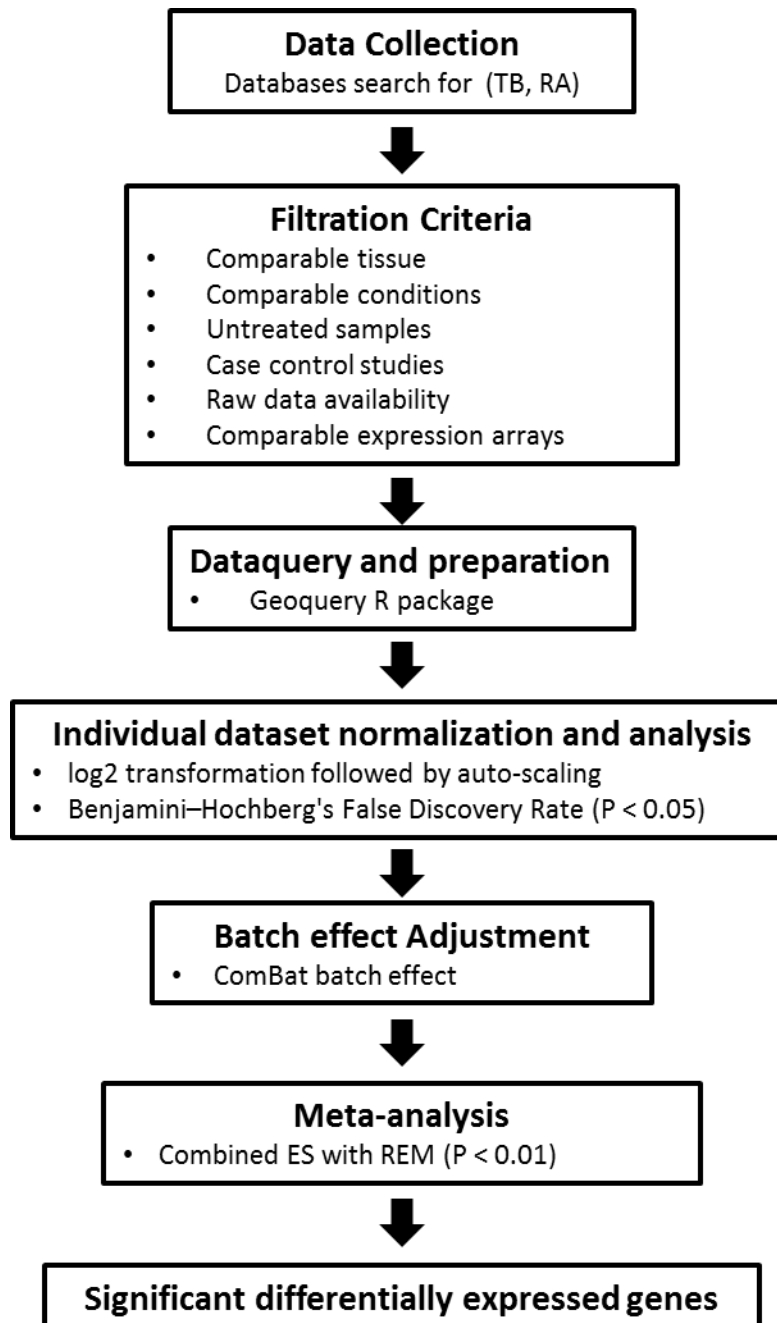

Supplement: pone.0213470.s001.pdf [file pone.0213470.s001.pdf]
