# Supplementary material for: Gene expression profiling meta-analysis reveals novel gene signatures and pathways shared between tuberculosis and rheumatoid arthritis
Source: PubMed Central journal article supplement (PMC6405138; doi:10.1371/journal.pone.0213470), 2019-03-07
Supplement: pone.0213470.s008.pdf [file pone.0213470.s008.pdf]

**S2 Table. List of included Samples in the meta-analysis.**

List of GEO sample accession IDs for the 141 samples included in the meta-analysis. (41 patients with active TB, 33 RA patients, and 67 healthy controls)

| Sample ID  | Condition | Sample ID  | Condition | Sample ID | Condition | Sample ID  | Condition |
|------------|-----------|------------|-----------|-----------|-----------|------------|-----------|
| GSM389705  | Healthy   | GSM484368  | Healthy   | GSM389703 | RA        | GSM1327526 | TB        |
| GSM389707  | Healthy   | GSM484369  | Healthy   | GSM389704 | RA        | GSM1327527 | TB        |
| GSM389709  | Healthy   | GSM484370  | Healthy   | GSM389706 | RA        | GSM1327528 | TB        |
| GSM389710  | Healthy   | GSM484371  | Healthy   | GSM389708 | RA        | GSM1327529 | TB        |
| GSM389712  | Healthy   | GSM484372  | Healthy   | GSM389711 | RA        | GSM1327530 | TB        |
| GSM389713  | Healthy   | GSM484373  | Healthy   | GSM389714 | RA        | GSM1327531 | TB        |
| GSM389715  | Healthy   | GSM484374  | Healthy   | GSM389716 | RA        | GSM1327533 | TB        |
| GSM389718  | Healthy   | GSM484375  | Healthy   | GSM389717 | RA        | GSM1327535 | TB        |
| GSM389720  | Healthy   | GSM484376  | Healthy   | GSM389719 | RA        | GSM1327540 | TB        |
| GSM389723  | Healthy   | GSM484377  | Healthy   | GSM389721 | RA        | GSM1599187 | TB        |
| GSM389725  | Healthy   | GSM484378  | Healthy   | GSM389722 | RA        | GSM1599188 | TB        |
| GSM389728  | Healthy   | GSM484379  | Healthy   | GSM389724 | RA        | GSM1599189 | TB        |
| GSM389729  | Healthy   | GSM484644  | Healthy   | GSM389726 | RA        | GSM484380  | TB        |
| GSM389732  | Healthy   | GSM484603  | Healthy   | GSM389727 | RA        | GSM484383  | TB        |
| GSM389734  | Healthy   | GSM484604  | Healthy   | GSM389730 | RA        | GSM484386  | TB        |
| GSM101869  | Healthy   | GSM484612  | Healthy   | GSM389731 | RA        | GSM484387  | TB        |
| GSM101870  | Healthy   | GSM484613  | Healthy   | GSM389733 | RA        | GSM484388  | TB        |
| GSM101871  | Healthy   | GSM484622  | Healthy   | GSM389735 | RA        | GSM484395  | TB        |
| GSM101872  | Healthy   | GSM484623  | Healthy   | GSM101879 | RA        | GSM484398  | TB        |
| GSM101873  | Healthy   | GSM484632  | Healthy   | GSM101880 | RA        | GSM484595  | TB        |
| GSM101874  | Healthy   | GSM484633  | Healthy   | GSM101881 | RA        | GSM484596  | TB        |
| GSM101875  | Healthy   | GSM484634  | Healthy   | GSM101882 | RA        | GSM484597  | TB        |
| GSM101876  | Healthy   | GSM484647  | Healthy   | GSM101883 | RA        | GSM484598  | TB        |
| GSM101877  | Healthy   | GSM484648  | Healthy   | GSM101884 | RA        | GSM484605  | TB        |
| GSM101878  | Healthy   | GSM1327542 | Healthy   | GSM101885 | RA        | GSM484606  | TB        |
| GSM101962  | Healthy   | GSM1327546 | Healthy   | GSM101886 | RA        | GSM484610  | TB        |
| GSM101963  | Healthy   | GSM1327544 | Healthy   | GSM102703 | RA        | GSM484611  | TB        |
| GSM101964  | Healthy   | GSM1327549 | Healthy   | GSM102704 | RA        | GSM484614  | TB        |
| GSM101965  | Healthy   | GSM1327550 | Healthy   | GSM102709 | RA        | GSM484618  | TB        |
| GSM101966  | Healthy   | GSM1599181 | Healthy   | GSM102705 | RA        | GSM484619  | TB        |
| GSM101967  | Healthy   | GSM1599182 | Healthy   | GSM484630 | TB        | GSM484620  | TB        |
| GSM101968  | Healthy   | GSM1599183 | Healthy   | GSM484631 | TB        | GSM484621  | TB        |
| GSM101969  | Healthy   | GSM102706  | RA        | GSM484638 | TB        | GSM484628  | TB        |
| GSM101970  | Healthy   | GSM102707  | RA        | GSM484639 | TB        | GSM484629  | TB        |
| GSM1327541 | Healthy   | GSM102708  | RA        | GSM484641 | TB        | GSM484642  | TB        |
|            |           |            |           |           |           | GSM484645  | TB        |
