# Supplementary material for: Gene expression profiling meta-analysis reveals novel gene signatures and pathways shared between tuberculosis and rheumatoid arthritis
Source: PubMed Central journal article supplement (PMC6405138; doi:10.1371/journal.pone.0213470), 2019-03-07
Supplement: pone.0213470.s009.pdf [file pone.0213470.s009.pdf]

**S3 Table. The 50 most highly up- or downregulated genes.**

A list of most significantly differentially regulated genes common to TB and RA vs. controls, detected through the random effect model (REM) in NetworkAnalyst. DEGs were first detected in their respective studies through Benjamini–Hochberg's False Discovery Rate (FDR) with cut-off p-values of < 0.05, before running the REM analysis. In total 341 genes (table S4) were found as significantly regulated by this method (P-value < 0.01).

Upregulated genes:

| EntrezID | Name      | CombinedES | P-value  | EntrezID | Name     | CombinedES | P-value    |
|----------|-----------|------------|----------|----------|----------|------------|------------|
| 7100     | TLR5      | 1,4674     | 2,47E-09 | 22921    | MSRB2    | 1,4496     | 8,90E-05   |
| 8743     | TNFSF10   | 2,0036     | 4,86E-09 | 1462     | VCAN     | 0,95884    | 9,24E-05   |
| 55288    | RHOT1     | 1,3542     | 2,39E-08 | 5728     | PTEN     | 0,95704    | 9,24E-05   |
| 23765    | IL17RA    | 1,2507     | 2,43E-07 | 91056    | AP5B1    | 0,97018    | 0,00010652 |
| 3240     | HP        | 1,1996     | 9,63E-07 | 24138    | IFIT5    | 0,94647    | 0,0001096  |
| 22849    | CPEB3     | 1,1736     | 1,47E-06 | 64397    | ZFP106   | 1,2214     | 0,00012596 |
| 115207   | KCTD12    | 1,1466     | 3,41E-06 | 3142     | HLX      | 0,94776    | 0,00012676 |
| 3176     | HNMT      | 1,1162     | 5,14E-06 | 22885    | ABLIM3   | 0,93706    | 0,00013773 |
| 5058     | PAK1      | 1,1049     | 6,33E-06 | 10673    | TNFSF13B | 1,3985     | 0,00014295 |
| 79932    | KIAA0319L | 1,0984     | 7,19E-06 | 2932     | GSK3B    | 0,93698    | 0,00014441 |
| 3934     | LCN2      | 1,0534     | 1,65E-05 | 1955     | MEGF9    | 1,5463     | 0,00014668 |
| 8819     | SAP30     | 1,0331     | 2,97E-05 | 1903     | S1PR3    | 0,93718    | 0,00014668 |
| 2745     | GLRX      | 1,9062     | 3,35E-05 | 10613    | ERLIN1   | 0,93537    | 0,00014668 |
| 79772    | MCTP1     | 1,0588     | 3,50E-05 | 10981    | RAB32    | 1,3899     | 0,00016729 |
| 26873    | OPLAH     | 1,1551     | 4,08E-05 | 2529     | FUT7     | 1,1976     | 0,00019552 |
| 23643    | LY96      | 1,9692     | 4,16E-05 | 1845     | DUSP3    | 1,4934     | 0,00021618 |
| 838      | CASP5     | 1,0912     | 4,27E-05 | 433      | ASGR2    | 1,0971     | 0,00021618 |
| 10261    | IGSF6     | 0,9927     | 5,55E-05 | 57616    | TSHZ3    | 1,3809     | 0,000222   |
| 8291     | DYSF      | 1,3642     | 6,43E-05 | 8402     | SLC25A11 | 0,90323    | 0,00024482 |
| 338339   | CLEC4D    | 1,2795     | 6,43E-05 | 9332     | CD163    | 0,92146    | 0,00027386 |
| 84316    | LSMD1     | 1,1187     | 6,56E-05 | 23586    | DDX58    | 0,89891    | 0,00030153 |
| 114769   | CARD16    | 1,4257     | 6,90E-05 | 23380    | SRGAP2   | 0,89742    | 0,00031664 |
| 10419    | PRMT5     | 0,97711    | 6,96E-05 | 1861     | TOR1A    | 0,88923    | 0,00033299 |
| 51065    | RPS27L    | 1,2664     | 7,61E-05 | 23569    | PADI4    | 0,88542    | 0,00033607 |
| 91543    | RSAD2     | 0,98354    | 8,65E-05 | 51311    | TLR8     | 1,4764     | 0,00034778 |

## Down-regulated genes:

| EntrezID | Name     | CombinedES | P-value    | EntrezID | Name      | CombinedES | P-value    |
|----------|----------|------------|------------|----------|-----------|------------|------------|
| 57062    | DDX24    | 1,294      | 9,64E-08   | 1408     | CRY2      | 0,87925    | 0,00042583 |
| 26051    | PPP1R16B | 1,3586     | 3,34E-07   | 6191     | RPS4X     | 0,86739    | 0,00045462 |
| 79868    | ALG13    | 1,1823     | 1,28E-06   | 79796    | ALG9      | 1,0251     | 0,00047214 |
| 3187     | HNRNPH1  | 1,4745     | 4,80E-06   | 64112    | MOAP1     | 1,0755     | 0,00052434 |
| 57602    | USP36    | 1,5677     | 5,21E-06   | 10425    | ARIH2     | 1,1568     | 0,00052595 |
| 55602    | CDKN2AIP | 1,0963     | 6,99E-06   | 7486     | WRN       | 1,0711     | 0,00055602 |
| 56257    | MEPCE    | 1,0558     | 1,65E-05   | 147694   | ZNF548    | 0,95848    | 0,00055602 |
| 6477     | SIAH1    | 1,055      | 1,65E-05   | 10199    | MPHOSPH10 | 0,85553    | 0,00059339 |
| 11044    | PAPD7    | 1,0246     | 3,27E-05   | 8665     | EIF3F     | 0,84643    | 0,00063299 |
| 338657   | CCDC84   | 1,1973     | 3,47E-05   | 56941    | C3orf37   | 0,87353    | 0,00063972 |
| 65108    | MARCKSL1 | 1,0621     | 3,61E-05   | 2254     | FGF9      | 0,84844    | 0,00066006 |
| 54476    | RNF216   | 1,4547     | 4,20E-05   | 6259     | RYK       | 0,92941    | 0,00077098 |
| 55683    | KANSL3   | 1,1817     | 6,43E-05   | 9117     | SEC22C    | 0,84337    | 0,00077098 |
| 51277    | DNAJC27  | 0,97476    | 6,90E-05   | 55846    | ITFG2     | 0,84182    | 0,00077098 |
| 4209     | MEF2D    | 1,0888     | 7,61E-05   | 23020    | SNRNP200  | 1,0772     | 0,00080654 |
| 93058    | COQ10A   | 1,1886     | 9,24E-05   | 3399     | ID3       | 1,5832     | 0,00089329 |
| 8731     | RNMT     | 1,156      | 9,24E-05   | 9267     | CYTH1     | 0,83255    | 0,00090035 |
| 51654    | CDK5RAP1 | 1,1401     | 0,00012596 | 2794     | GNL1      | 0,82794    | 0,00096285 |
| 6832     | SUPV3L1  | 1,3574     | 0,00014449 | 55661    | DDX27     | 0,83237    | 0,00096671 |
| 7050     | TGIF1    | 1,2326     | 0,00014668 | 55274    | PHF10     | 0,82724    | 0,00096671 |
| 79156    | PLEKHF1  | 0,93213    | 0,00014757 | 2889     | RAPGEF1   | 0,95124    | 0,0010094  |
| 64745    | METTL17  | 0,9622     | 0,0001492  | 23234    | DNAJC9    | 0,82806    | 0,0010458  |
| 23119    | HIC2     | 0,91973    | 0,00016827 | 130074   | FAM168B   | 0,81238    | 0,0013477  |
| 9533     | POLR1C   | 1,3076     | 0,00023909 | 51569    | UFM1      | 0,80466    | 0,0013505  |
| 113791   | PIK3IP1  | 1,597      | 0,00042583 | 54946    | SLC41A3   | 1,0231     | 0,00144    |
