# Supplementary material for: Gene expression profiling meta-analysis reveals novel gene signatures and pathways shared between tuberculosis and rheumatoid arthritis
Source: PubMed Central journal article supplement (PMC6405138; doi:10.1371/journal.pone.0213470), 2019-03-07
Supplement: pone.0213470.s010.pdf [file pone.0213470.s010.pdf]

**S4 Table. A list of the significantly deregulated genes.**

List of the significant 341 genes (P-value < 0.01), that was used for pathway enrichment analysis.

| Gene official symbol |          |           |           |          |          |          |          |
|----------------------|----------|-----------|-----------|----------|----------|----------|----------|
| DDX24                | KANSL2   | TLR5      | TCIRG1    | BATF     | RAPGEF1  | DDX58    | NDUFAF3  |
| PPP1R16B             | RNF125   | TNFSF10   | F13A1     | MXD3     | DNAJC9   | SRGAP2   | C22orf39 |
| ALG13                | RPL19    | RHOT1     | S100A12   | MFSD1    | FAM168B  | TOR1A    | CLEC1B   |
| HNRNPH1              | FBXW4    | IL17RA    | NIPSNAP3A | TRIB1    | UFM1     | PADI4    | MKNK1    |
| USP36                | FAM43A   | HP        | EXOC6     | PRDX4    | SLC41A3  | TLR8     | LAMTOR2  |
| CDKN2AIP             | RRP8     | CPEB3     | PROS1     | COX15    | PARP6    | MLKL     | CECR6    |
| MEPCE                | WDR74    | KCTD12    | PLBD1     | CTSS     | RIOK1    | IFIT3    | LPAR6    |
| SIAH1                | TUBGCP5  | HNMT      | FBXL5     | CMPK2    | JOSD1    | ITGA2B   | CETP     |
| PAPD7                | YTHDC1   | PAK1      | TNFAIP8L2 | TMX1     | ILKAP    | OSTM1    | APOBR    |
| CCDC84               | ZSCAN18  | KIAA0319L | TMEM165   | CDKN2C   | BSDC1    | TMEM8A   | SAMD9L   |
| MARCKSL1             | EXOSC6   | LCN2      | F5        | VPS29    | RALGAPA1 | CCDC53   | LSM10    |
| RNF216               | HNRNPA0  | SAP30     | YIPF1     | COMMD10  | BRWD1    | SPTLC2   | SORT1    |
| KANSL3               | LUC7L    | GLRX      | DHRS7B    | FBN2     | SAAL1    | SIGLEC5  | COMMD9   |
| DNAJC27              | REV1     | MCTP1     | RENBP     | CFP      | DHX9     | RNF31    | LTBR     |
| MEF2D                | RABGGTB  | OPLAH     | C1QB      | SIRPB1   | ANKRA2   | OAS3     | IFI44L   |
| COQ10A               | LY9      | LY96      | MGST1     | HAL      | CAMK2N1  | RTN3     | DAD1     |
| RNMT                 | POLE3    | CASP5     | B3GNT8    | NRD1     | PARP15   | HOOK3    | RNASE2   |
| CDK5RAP1             | TYW3     | IGSF6     | MX2       | RGS19    | CCR7     | STAB1    | PARP9    |
| SUPV3L1              | AFG3L2   | DYSF      | BLVRA     | ACOT13   | GPR183   | STOM     | KAL1     |
| TGIF1                | LANCL2   | CLEC4D    | C9orf66   | MSRB1    | WDR19    | AURKB    | IFI44    |
| PLEKHF1              | RPLP0    | LSMD1     | FKBP15    | BRK1     | SGSM2    | EIF2AK2  | STX3     |
| METTL17              | STARD5   | CARD16    | GIMAP2    | FAM111A  | CYP2E1   | IFIT1    | SCO2     |
| HIC2                 | NCBP2    | PRMT5     | NAGK      | MCTS1    | PRPS1    | NUDT16   | LGALS9   |
| POLR1C               | SURF6    | RPS27L    | MKL1      | KIF15    | CLEC7A   | CRISPLD2 | LDB3     |
| PIK3IP1              | S1PR1    | RSAD2     | IGFL2     | TK2      | ATXN7L2  | IGF2BP3  | P2RY10   |
| CRY2                 | PTBP2    | MSRB2     | ATG7      | NUDT22   | RINT1    | SLC22A16 | HK3      |
| RPS4X                | DMTF1    | VCAN      | FOLR3     | ECHDC3   | BIN1     | RNF169   | FGF9     |
| ALG9                 | GABPA    | PTEN      | C2orf88   | TMBIM4   | MCOLN2   | CASP1    | RYK      |
| MOAP1                | PASK     | AP5B1     | ANKRD22   | C4orf34  | DUSP2    | KIAA0040 | SEC22C   |
| ARIH2                | E4F1     | IFIT5     | S100A6    | DHTKD1   | EIF3L    | VWA5A    | ITFG2    |
| WRN                  | SNRPA1   | ZFP106    | TMLHE     | SHKBP1   | THOC1    | TREML1   | SNRNP200 |
| ZNF548               | SELM     | HLX       | MPO       | CSTA     | ELP2     | THOC5    | ID3      |
| MPHOSPH10            | RPL37    | ABLIM3    | ANKRD35   | ILK      | SHISA2   | DBI      | CYTH1    |
| EIF3F                | WDR43    | TNFSF13B  | SASH3     | SCCPDH   | RPS19    | ATP6V0E1 | GNL1     |
| C3orf37              | MAP3K4   | GSK3B     | DSC2      | MARCO    | LONP1    | PML      | DDX27    |
| PHF10                | CXorf40A | MEGF9     | PIGF      | SH3BGRL2 | PVRIG    | PRM3     | ARHGEF7  |
| ZBED4                | DNAJC18  | S1PR3     | LMO2      | PARP10   | MED10    | TRAFD1   | FOSB     |
| PRNP                 | RUNX3    | ERLIN1    | PSMA4     | NAGA     | TRABD    | SKA2     | POLR2D   |
| FLYWCH1              | NUP107   | RAB32     | KLHL8     | FAM198B  | ZNF212   | C1QA     | LST1     |
| TSHZ3                | IQGAP1   | FUT7      | EIF2C4    | IFI27    | LRP5L    | DUSP7    | VAMP5    |
| SLC25A11             | TMEM180  | DUSP3     | POLE4     | XAF1     | FN3KRP   | ACOX1    | MYL12A   |
| CD163                | VAMP8    | ASGR2     | LIN7A     | LRP1     | LAS1L    | NEXN     | NDUFS4   |
| TOMM20               | AGPAT1   | EEF2      | MTIF3     | PRPF8    |          |          |          |
