# Supplementary material for: Gene expression profiling meta-analysis reveals novel gene signatures and pathways shared between tuberculosis and rheumatoid arthritis
Source: PLOS journal article supplement (doi:10.1371/journal.pone.0213470), 2019-03-07
Supplement: S7 (10.1371/journal.pone.0213470.s007) [file journal.pone.0213470.s007]

**S1 Table. Summary of the datasets integrated in the meta-analysis pipeline.**

Six datasets matched our meta-analysis inclusion criteria and were considered for downstream analysis.

A total of 141 samples (41 patients with active TB, 33 RA patients and 67 healthy controls) were included.

| <b>RA</b> | <b>PMID</b> | <b>Data set</b> | <b>Platform</b> | <b>Study</b>                                                                                                          | <b>cell type</b>  | <b>samples</b> | <b>patients</b> | <b>controls</b> | <b>Reference</b> |
|-----------|-------------|-----------------|-----------------|-----------------------------------------------------------------------------------------------------------------------|-------------------|----------------|-----------------|-----------------|------------------|
| 1         | 19710928    | GSE15573        | GPL6102         | Immunity and Defense Genes in Peripheral Blood Mononuclear Cells of Rheumatoid Arthritis patients                     | PBMC              | 33             | 18              | 15              | 24               |
| 2         | NA          | GSE4588         | GPL570          | Identification of genes specifically over-expressed in lupus CD4 T and B cells                                        | CD4 T and B cells | 34             | 15              | 19              | NA               |
| <b>TB</b> | <b>PMID</b> | <b>Data set</b> | <b>Platform</b> | <b>Study</b>                                                                                                          | <b>cell type</b>  | <b>samples</b> | <b>patients</b> | <b>controls</b> | <b>Reference</b> |
| 1         | 24647646    | GSE54992        | GPL570          | Increased complement C1q level marks active disease in human tuberculosis                                             | PBMC              | 15             | 9               | 6               | 25               |
| 2         | 25992611    | GSE65517        | GPL10558        | Comparative analysis of monocytes from healthy donors, patients with metastatic breast cancer, sepsis or tuberculosis | PBMC              | 6              | 3               | 3               | 26               |
| 3         | 20725040    | GSE19435        | GPL6947         | Transcriptional profiles in Blood of patients with Tuberculosis - Longitudinal Study                                  | Whole blood       | 19             | 7               | 12              | 27               |
| 4         | 20725040    | GSE19444        | GPL6947         | Blood Transcriptional Profiles of Active and Latent TB                                                                | Whole blood       | 34             | 22              | 12              | 27               |
